# Supplementary material for: Health-related quality of life among children, young people and adults with esophageal atresia: a review of the literature and recommendations for future research
Source: Springer Nature journal article supplement (doi:10.1007/s11136-015-0975-x), 2015-04-01
Supplement: MOESM2 [file 284420]

| Table 2. Overview of questionnaires used to measure health-related quality of life in patients with esophageal atresia  Title: Health related quality of life among children, young people and adults with esophageal atresia: a review of the literature and recommendations for future research.  Authors and affiliations: Michaela Dellenmark-Blom*1 R.N. M.Sc. Ph.D. student, John Eric Chaplin2 AFBPsS C.Psych.Ph.D., Vladimir Gatzinsky1 M.D. Ph.D., Linus Jönsson1 M.D., Ph.D., Kate Abrahamson1 M.D. Associate Professor. 1Department of Pediatric Surgery, The Queen Silvia Children’s Hospital, Sahlgrenska University Hospital, 416 85 Gothenburg 2 Gothenburg Pediatric Growth Research Center (GPGRC). Department of Pediatrics, Institute of Clinical Sciences, Gothenburg University, 416 85 Gothenburg, Sweden * Corresponding author. E-mail: [michaela.m.blom@vgregion.se](mailto:michaela.m.blom@vgregion.se)  Journal: Quality of Life Research. | | | | | | | | | | | | |
| --- | --- | --- | --- | --- | --- | --- | --- | --- | --- | --- | --- | --- |
| Questionnaire (reference number) | Intended concept to measure and target population | Year/ country of origin | Age group | Reporter | Content | Number of items | Response Scale | Recall period | Interpretability | Cultural and/or translational adaption | Alternate forms | Respondent burden/administrative burden |
| Affect Balance Scale (63-67) | To assess positive and negative affect as indicators of life satisfaction and/or well-being in the general population | 1969/USA | Adult | Self | Positive affect questions  Negative affect questions | 10 | 4-point scale scored as *Never* to *Often* | Past few weeks | No | Yes | No | Minimal burden/ No training is necessary for administration |
| Child Health Questionnaire (31-38) | To measure the HRQOL in healthy children and adolescents and those with acute and chronic conditions | 1996/USA | Child (10–18) | Self/Proxy | General health perceptions  Physical functioning  Role/social physical functioning  Bodily pain  Role/social emotional functioning  Role/social behavioral functioning  Parent impact-time  Parent impact-emotional  Self-esteem  Mental health Behavior  Family activities  Family cohesion  Change in health | Child-report 87 | Depending on the item. Each item consists of 4-6 response options. | Varies by subscale. Most scales have 4 weeks | Yes | Yes | Yes | Answer 6 items per minute/Administration time 5–25 minutes. No training is necessary for administration |
| Parent (4–18) | Parent report 50 |
|  | Short parent-version 28 |
| European Organization into Research and Treatment of Cancer – Esophageal cancer-18 (78-80) | To assess HRQOL in patients with esophageal cancer undergoing surgery, chemotherapy, radiotherapy and/or endoscopic treatment | 1998–2001 /United Kingdom, France, Germany, Sweden, Australia, Spain | Adult | Self | Dysphagia  Eating  Reflux  Esophageal pain  Swallowing saliva  Choking when swallowing  Dry mouth  Taste problems  Coughing  Speech problems | 18 | 4-point response scale scored as *Not at all* to *Very much* | 1 week | Yes | Yes | No | Completion of generic and disease-specific questionnaires in about 15 minutes  /Not reported |
| Gastrointestinal Quality of Life Index (81-85) | To assess HRQOL specifically for patients with gastrointestinal disease | 1989–1990 /Germany  Canada, United Kingdom, Germany, USA | Adult | Self | Physical function  Emotional function  Social function  Gastrointestinal disease-related symptoms  Inconvenience of a medical treatment | 32/36 | 5-point response scale scored as *All the time* to *Never* | 2 weeks | Yes | Yes | No | Minimal burden  /Not reported |
| Health Disease and Education (68) | To grade the impact of an anomaly on the HRQOL and to degree the disability caused by the operative scar due to EA | Not reported | Adult | Self | Not reported | Not reported | 4 point- response scale scored as  *None* to Severe | Not reported | Not reported | Not reported | Not reported | Not reported |
| Illness Cognition Questionnaire (69-70) | To assess the cognitions helplessness, acceptance and perceived benefits across different chronic diseases | 2001/Netherlands | Adult | Self | Helplessness  Acceptance  Disease benefits | 18 | 4 point- response scale scored as *Not at all* to C*ompletely* | None | No | No | No | Not reported |
| Karnofsky Performance Status (71-72) | To assess the functional performance, side-effects of treatment and disease-specific symptoms in cancer patients | 1948/1980/USA | Adult | Clinician | Ability to perform activities of daily living  Ability to work  Need of medical assistance | 1 | 11-point scale correlating to percentage values which describe three states of performance | None | No | No | No | Not reported |
| KIDSCREEN-27 (39-44) | To assess children’s and adolescents’ subjective health and well-being | 2001–2004/Developed simultaneously in 13 European countries | Child and Parent (8–18) | Self/ Proxy | Well-being  Autonomy  Parents  Social Support and Peers  School environment | Child and parent report Long version 52 | 5-point scale scored as *Never* to *Always* | 1 week | Yes | Yes | Yes | Respondents answer in 10-15 minutes /No training is necessary for administration |
| Child and parent Short version 27 |
| Child and parent General HRQOL index 27 |
| Pediatric Quality of Life Inventory 4.0 (45-51) | To measure HRQOL in healthy children and children with acute or chronic conditions | 2001/ USA | Child (5–18)  Parent (2–18) | Self/  Proxy | Physical function  Emotional function  Social function  School function | Child-report 23 | 5-point response scale scored as *Never a problem* to  *Almost always a problem*.  Adjusted to a 3-point scale for children aged 5-7 years | 1 month  1 week | Yes | Yes | Yes | Respondent completion < 4 minutes /  No training is necessary for administration |
| Short-version 15 |
| The Respiratory Symptoms–Related Quality of Life Index (68) | To assess HRQOL related to respiratory diseases and problems | Not reported/Finland | Not reported | Not reported | Not reported | 15 | 4-point response scale grading respiratory dysfunction (no more information reported) | Not reported | Not reported | Not reported | Not reported | Not reported |
| 36-Item Short Form Survey from the RAND Medical Outcomes Study  SF-36 (52-56) | To measure generic HRQOL and health concepts relevant across age, disease, and treatment groups | 1988/USA | Adult | Self | Physical functioning  Role-physical  Bodily pain  General health  Vitality  Social functioning  Role-emotional  Mental health | Long-version 36 | Depending on the item. In version 2.0, there is a 5-level response choice and a dichotomous response choice | 4 weeks  1 week | Yes | Yes | Yes | 2–10 minutes/  Administrative burden minimal |
| Short- version 12 |
| The Spitzer Quality of Life Index (57-59) | To develop a quantitative index to measure HRQOL to be used in patients with cancer and other chronic diseases | 1980/Canada, Australia | Adult | Self | Activity  Daily Living  Health  Support  Outlook on life | 5 | 3-point response scale of scores 0-2 | 1 week | No | Yes | No | Physician < 1 minute |
| The Strategy and Attributional Questionnaire (73-74) | To measure cognitive and attributional strategies | 1995/Finland | Adult | Self | Success expectations  Task-irrelevant behavior  Seeking social support  Reflective thinking  Master-orientation in an achievement situation | 60 | 4-point response scale scored as *Strongly disagree* to *Agree* | None | No | Yes | No | Not reported |
| Visual Analogue Scale/Uniscale for overall HRQOL (60-62) | To develop a method of measurement for the perceived HRQOL of cancer patients using linear analogue scales | 1981-1984/Canada | Adult | Self | Overall perceived QOL/HRQOL | 1 | 10 cm linear analogue scale (0–100) with higher scores indicated better HRQOL | Not reported | No | No | No | Respondent burden minimal |
| World Health Organizaion-5 Well–Being Index (75-77) | To measure current mental well-being | 1998/Denmark (international collaboration) | Adult | Self | Positively worded feelings in following order  1) I have felt cheerful and in good spirits  2) I have felt calm and relaxed  3) I have felt active and vigorous  4) I woke up feeling fresh and rested  5) My daily life has been filled with things that interest me | 5 | 6-point scale grading positive feelings from *Most of the time* to *Never* | 2 weeks | Yes | Yes | No | Respondent burden minimal |
| Questionnaire information is taken from the references in the first column. | | | | | | | | | | | |  |
