# Supplementary material for: Health-related quality of life among children, young people and adults with esophageal atresia: a review of the literature and recommendations for future research
Source: Springer Nature journal article supplement (doi:10.1007/s11136-015-0975-x), 2015-04-01
Supplement: MOESM3 [file 284420]

| Table 3. Summary of the psychometric properties of the questionnaires used to measure health related quality of life (HRQOL) in patients with esophageal atresia  Title: Health related quality of life among children, young people and adults with esophageal atresia: a review of the literature and recommendations for future research.  Authors and affiliations: Michaela Dellenmark-Blom*1 R.N. M.Sc. Ph.D. student, John Eric Chaplin2 AFBPsS C.Psych.Ph.D., Vladimir Gatzinsky1 M.D. Ph.D., Linus Jönsson1 M.D., Ph.D., Kate Abrahamson1 M.D. Associate Professor. 1Department of Pediatric Surgery, The Queen Silvia Children’s Hospital, Sahlgrenska University Hospital, 416 85 Gothenburg 2 Gothenburg Pediatric Growth Research Center (GPGRC). Department of Pediatrics, Institute of Clinical Sciences, Gothenburg University, 416 85 Gothenburg, Sweden * Corresponding author. E-mail: [michaela.m.blom@vgregion.se](mailto:michaela.m.blom@vgregion.se)  Journal: Quality of Life Research. | | | | | | | | |
| --- | --- | --- | --- | --- | --- | --- | --- | --- |
| Questionnaire (reference number) | Sample | Reliability | | Content validity | Construct validity | | Criterion Validity | Responsiveness |
|  |  | Internal consistency (Cronbach’s alpha) | Reproducibility (time duration re-test, interrater) |  | Convergent validity | Discriminant validity |  |  |
| Affect Balance Scale (63-67) | Healthy people | 0.60– 0.73 | 0.76–0.83 (3-day period) | Healthy people | Yes | Not reported | Yes | Change in affect variables is age-related, although these changes are relatively small |
| Child Health Questionnaire (31-38) | Originally developed in studies of healthy children and children with Attention deficit hyperactivity disorder and with end-stage renal disease/ The CHQ was used in a Dutch study to evaluate HRQOL in EA. In validation of the Dutch CHQ, the sample consisted of school-children and parents of school-aged children | 0.63–0.91 (child original field test)  0.56–0.90 (Dutch sample of school aged children) | 0.06–0.84 (2 weeks in a sample of Dutch school aged children) | Patients | Yes | Yes | Yes | Sensitive to disease change in chronic pain or fatigue |
| 0.39–0.96 (average 0.72 in parents of Dutch school aged children) | 0.31–0.84 (2 weeks in a sample of parents of Dutch school aged children) |
| European Organization into Research and Treatment of Cancer – Esophageal cancer-18 (78-80) | Adults with esophageal cancer | 0.47-0.80 | Not reported | Patients  Health professionals | Yes | Yes | Yes | Sensitive to change over time in patients with different severity of disease and treatments |
| Gastrointestinal Quality of Life Index (81-85) | Adults with disorders of the esophagus, stomach, gallbladder, pancreas, small intestine, colon and rectum | >0.90 | 0.92 (48 hours) | Patients  Health professionals  Relatives | Not reported | Yes | Yes | Sensitive to improved HRQOL in patients before and after surgery |
| Health Disease and Education (68) | Not reported | Not reported | Not reported | Not reported | Not reported | Not reported | Not reported | Not reported |
| Illness Cognition Questionnaire (69-70) | Adults with rheumatoid arthritis and Multiple sclerosis | 0.84–0.91 | 0.68–0.79 (1 year) | Patients  Health professionals  Researchers | Yes | Yes | Yes | Not reported |
| Karnofsky Performance Status (71-72) | Adults with cancer | Not reported | 0.69 (1 week, nurse-social worker) | Not reported | Not reported | Yes | Not reported | Correlation with worsening in function in patients with cancer |
| KIDSCREEN-27 (39-44) | Healthy and chronically ill children and adolescents and their parents | 0.78–0.84 | 0.6 or above (2 weeks, due to the 2-week test–retest interval and taking into account the 1-week timeframe of the KIDSCREEN items intraclass correlation coefficients of 0.6 or higher were considered as acceptable) | Patients  Parents | Yes | Yes | Yes | Not reported for KIDSCREEN-27 |
| Pediatric Quality of Life Inventory 4.0 (45-51) | Healthy and chronically ill children with cancer (PEDSQL 1.0), and other health conditions (PedsQL 4.0) | 0.88 (child original field test) | 0.70 (2 weeks, sample of children with recurrent headache) | Patients  Parents (PedsQL 1.0) | Yes | Yes | Yes | Sensitive to clinical change in cardiac disease, pediatric orthopedics clinic setting and Rheumatic disease |
| 0.90 (parent original field test) |
| The Respiratory Symptoms–Related Quality of Life Index (68) | Not reported | Not reported | Not reported | Pulmonologist  Pediatric Surgeons | Not reported | Not reported | Not reported | Not reported |
| 36-Item Short Form Survey from the RAND Medical Outcomes Study  SF-36 (52-56) | Adults with different health conditions such as hypertension, diabetes, congestive heart failure and recent myocardial infarction etc | 0.70 or above | 0.90 or above | No (compared with other generic health surveys) | Yes | Yes | Yes | Sensitive to change in health status and health perception, for different medical conditions and treatments |
| The Spitzer Quality of Life Index (57-59) | Adults with cancer and other chronic conditions like rheumatoid arthritis, advanced diabetes, spinal injury, chronic obstructive disease | 0.775 | 0.74–0.81 (Physician–Physician, 1 week)  0-61–0.69 (Physician–patient, not reported) | Health professional  Patients  Relatives  Healthy people | Yes | Yes | Not reported | Not reported |
| The Strategy and Attributional Questionnaire (73-74) | Originally undergraduates at the university of Helsinki | 0.55–0.83 | 0.48–0.89 (6 months) | Not reported | Yes | Yes | Yes | Not reported |
| Visual Analogue Scale/Uniscale for overall HRQOL (60-62) | Adults with cancer | 0.91 | 0.72 (1 week) | Patients | Yes | Not reported | Yes | Not reported |
| World Health Organizaion-5 Well–Being Index (75-77) | General population but has been evaluated among patients with diabetes, patients in older age and patients in psychiatric service | 0.84–0.90 | Not reported | Not reported (derived from the 28-item WHO questionnaire which belonged to an overall index of positive and negative well-being in a single uni-dimensional scale) | Yes | Yes | Yes | Sensitive to treatment response in patients within psychiatric services |
| Not reported = information was not available. Information is reported from the references in the first column. | | | | | | | | |
